# Supplementary material for: Traditional Chinese medicine Bu-Shen-Jian-Pi-Fang attenuates glycolysis and immune escape in clear cell renal cell carcinoma: results based on network pharmacology
Source: PubMed Central journal article supplement (PMC8202066; doi:10.1042/bsr20204421), 2021-06-10
Supplement: BSR-2020-4421_supp.pdf [file BSR-2020-4421_supp.pdf]

**Table S1.** List of primers sequencing from 5' to 3' used for RT-qPCR

| Genes symbols  | Primers sequencing                                                              |
|----------------|---------------------------------------------------------------------------------|
| VEGFA          | F - AGG GCA GAA TCA TCA CGA AGT<br>R - AGG GTC TCG ATT GGA TGG CA               |
| HB-EGF         | F - ATC GTG GGG CTT CTC ATG TTT<br>R - TTA GTC ATG CCC AAC TTC ACT TT           |
| TNF            | F - GAG GCC AAG CCC TGG TAT G<br>R - CGG GCC GAT TGA TCT CAG C                  |
| GLUT1          | F - TAG AAA CAT GGT TTT GAA ATG CTT<br>R - CCC ACT TAC TTC TGT CTC ACT CC       |
| LDHA           | F - TGG AAA TAT TAG GCT ATT CTT GGG C<br>R - GAC TAT TAC ATC CTC TGC TAT TAG TC |
| HK2            | F - ATC CCT GAG GAC ATC ATG CGA<br>R - CTT ATC CAT GAA GTT AGC CAG GCA          |
| PGK1           | F - CCG CTT TCA TGT GGA GGA AGA AG<br>R - CTC TGT GAG CAG TGC CAA AAG C         |
| PDL1           | F - TGC CGA CTA CAA GCG AAT TAC TG<br>R - CTG CTT GTC CAG ATG ACT TCG G         |
| CTLA4          | F - CCA GTT CCT TTC AAT GGT TTG C<br>R - GCC CAT CGA ACT GGA GC                 |
| IL6            | F - GGC ACT GGC AGA AAA CAA CC<br>R - GCA AGT CTC CTC ATT GAA TCC               |
| MTOR           | F - AGC ATC GGA TGC TTA GGA GTG G<br>R - CAG CCA GTC ATC TTT GGA GAC C          |
| $\beta$ -actin | F - CCT CGC CTT TGC CGA TC<br>R - GGA TCT TCA TGA GGT AGT CAG TC                |
